# Supplementary material for: Efficient electrosynthesis of dimethyl carbonate from urea and methanol under mild conditions
Source: Royal Society of Chemistry journal article supplement (doi:10.1039/d2re00480a), 2022-12-31
Supplement: d2re00480a1.pdf [file d2re00480a1.pdf]

# **Efficient electrosynthesis of dimethyl carbonate from urea and methanol under mild conditions**

Mingjuan Sun,<sup>a</sup> Fengjiao Li,<sup>\*ab</sup> Yanhui Cui,<sup>a</sup> Xiaolin Zhao,<sup>a</sup> Haiwei Chen,<sup>a</sup> and  
Shuting Liang<sup>c</sup>

<sup>a</sup> Shenzhen Automotive Research Institute, Beijing Institute of Technology, Shenzhen  
518118, Guangdong, China

<sup>b</sup> National Engineering Laboratory for Electric Vehicles, Beijing Institute of  
Technology, Beijing 100081, Beijing, China

<sup>c</sup> Chongqing Key Laboratory of Environmental Materials & Remediation Technologies,  
Chongqing University of Arts and Sciences, Chongqing 402160, China

**Corresponding author:** Email: lifengjiao@szari.ac.cn

## 1. Experimental

### 1.1. CV experiments

The cyclic voltammetry (CV) experiments were carried out in an undivided one-compartment cell using CHI760E electrochemical station (Shanghai Chenhua Instrument Company, China) with glassy carbon electrode as the working electrode, platinum plate as the counter electrode, and saturated calomel (SCE) as the reference electrode. The scan rate was  $100 \text{ mV s}^{-1}$ . CVs were also tested using Ag/AgCl as the reference electrode similar to the procedure of SCE.

### 1.2. Methoxide capture experiment

The methoxide capture experiment was employed in an H-cell reactor with a Nafion-117 membrane separating the anode and cathode. Firstly, the electrosynthesis experiment was carried out under the conditions of  $C_{\text{urea}} = 0.05 \text{ mol L}^{-1}$ ,  $C_{\text{NaBr}} = 0.15 \text{ mol L}^{-1}$ ,  $T = 288 \text{ K}$ , *Current Density* =  $20 \text{ mA cm}^{-2}$ , and *Time* = 12 h. Then, after the electrosynthesis experiment was finished, the 0.05 M 1-iodobutane was added into the cathode compartment solution and stirred for 3 h. Finally, the cathode compartment solution was analyzed by GC in comparison with butyl methyl ether standard.

### 1.3. Equations for electrosynthesis of DEC, DPC, DBC, EC, and PC

The corresponding equations for electrosynthesis of DEC, DPC, DBC, EC, and PC are shown below:

(I) Electrosynthesis of DEC from urea and ethanol:

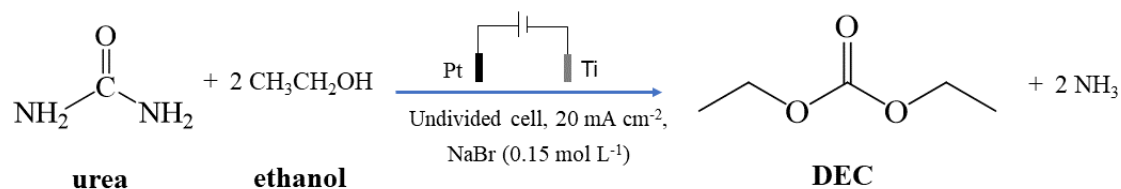

(II) Electrosynthesis of DPC from urea and n-propanol:

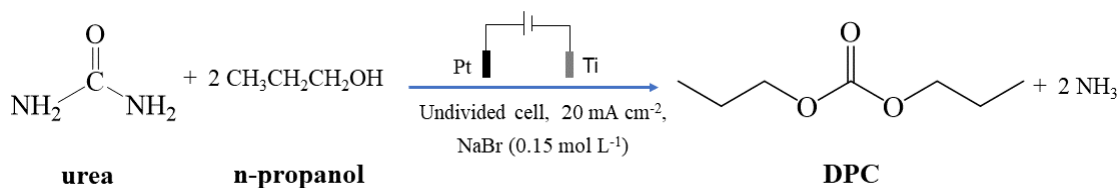

(III) Electrosynthesis of DBC from urea and n-butyl alcohol:

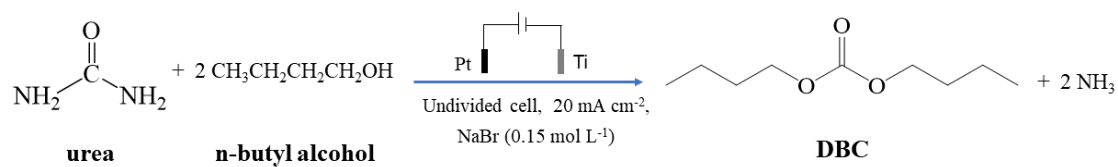

(IV) Electrosynthesis of EC from urea and ethylene glycol:

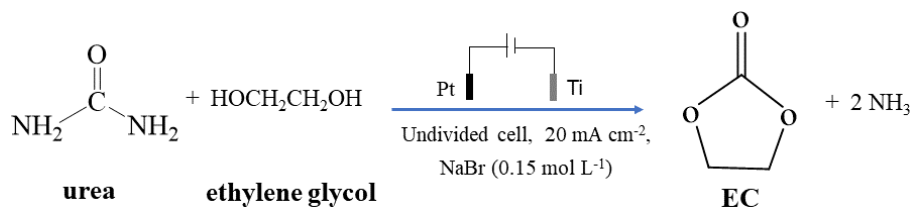

(V) Electrosynthesis of PC from urea and 1,2-propanediol:

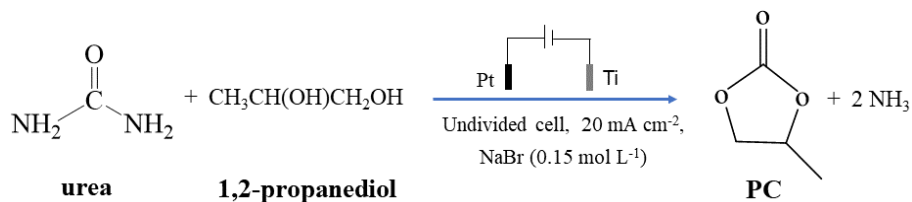

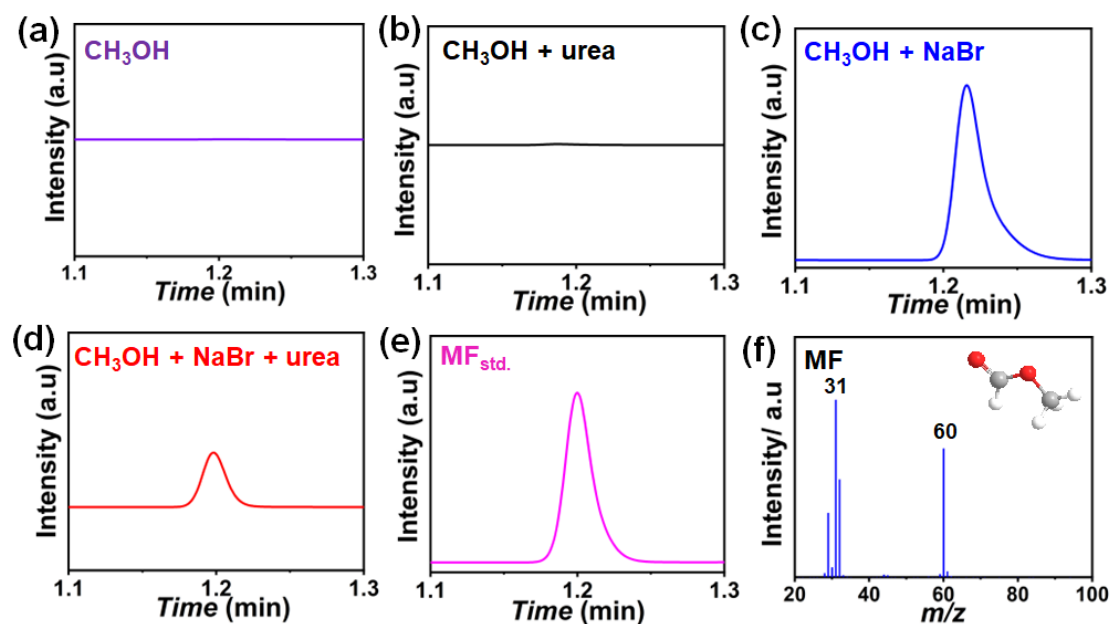

**Fig. S1** Comparison of gas chromatograms of different electrochemical reactions of (a) pure CH<sub>3</sub>OH (20 mL), (b) CH<sub>3</sub>OH (20 mL) + urea (0.15 mol L<sup>-1</sup>), (c) CH<sub>3</sub>OH (20 mL) + NaBr (0.15 mol L<sup>-1</sup>), and (d) CH<sub>3</sub>OH (20 mL) + urea (0.15 mol L<sup>-1</sup>) + NaBr (0.15 mol L<sup>-1</sup>) over Pt (+)|Ti (-) electrodes under the conditions of 298 K, 20 mA cm<sup>-2</sup>, and 36 h with that of (e) MF standard (MF<sub>std.</sub>); (f) Mass spectrum of MF obtained from the experiment of “CH<sub>3</sub>OH + urea + NaBr”.

It can be seen that in the absence of NaBr supporting electrolyte, MF was hardly produced in the methanol solution (a) or the mixed solution containing methanol and urea (b). In contrast, MF was obviously observed in the experiments of “CH<sub>3</sub>OH + NaBr” and “CH<sub>3</sub>OH + urea + NaBr”, indicating that NaBr is also crucial for the formation of MF.

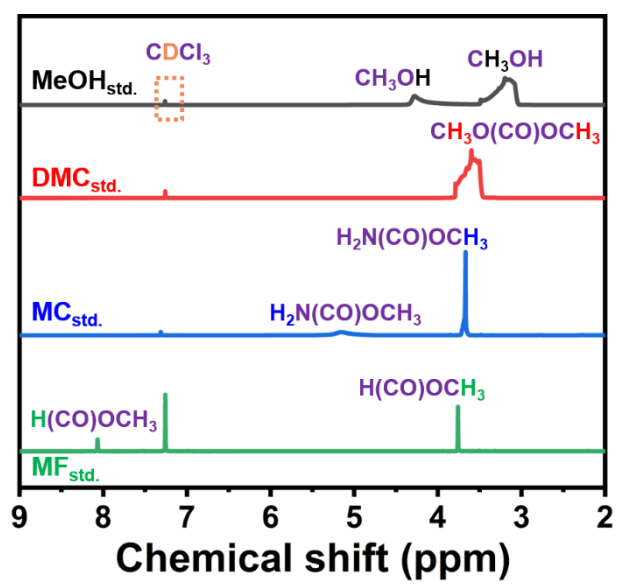

**Fig. S2**  $^1\text{H}$ NMR spectra of standard chemicals.

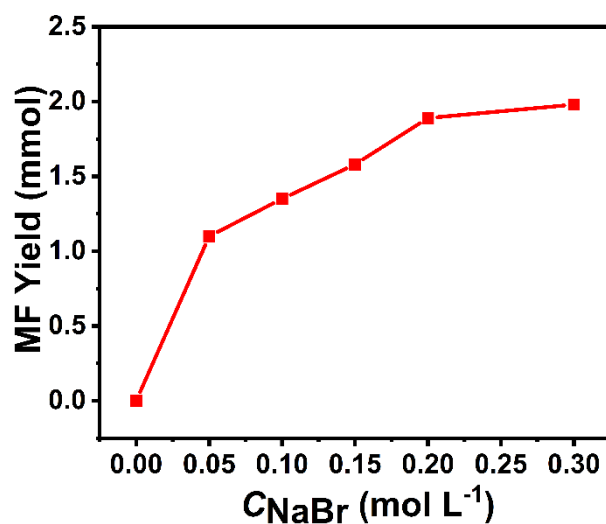

**Fig. S3** Effect of NaBr concentration on MF yield over Pt (+)|Ti (-) electrodes.  
Reaction conditions:  $C_{\text{urea}} = 0.15 \text{ mol L}^{-1}$ , methanol (20 mL),  $T = 298 \text{ K}$ , *Current*  
*Density* =  $20 \text{ mA cm}^{-2}$ , *Time* = 36 h.

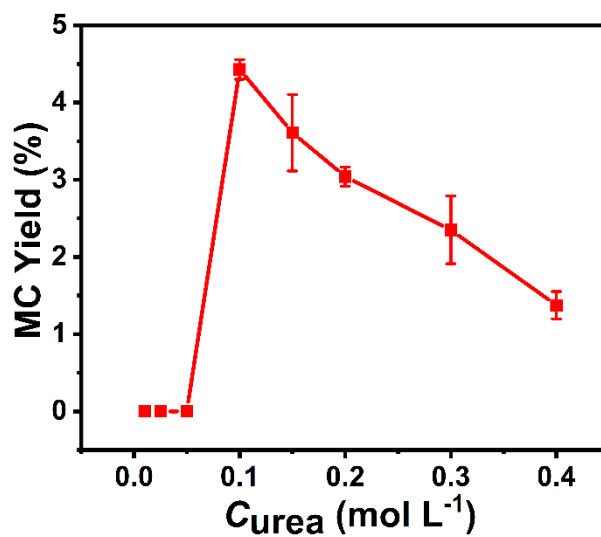

**Fig. S4** Effect of urea concentration on MC yield over Pt (+)|Ti (-) electrodes.  
Reaction conditions:  $C_{\text{NaBr}} = 0.15 \text{ mol L}^{-1}$ , methanol (20 mL),  $T = 298 \text{ K}$ , *Current Density* =  $20 \text{ mA cm}^{-2}$ , *Time* = 36 h.

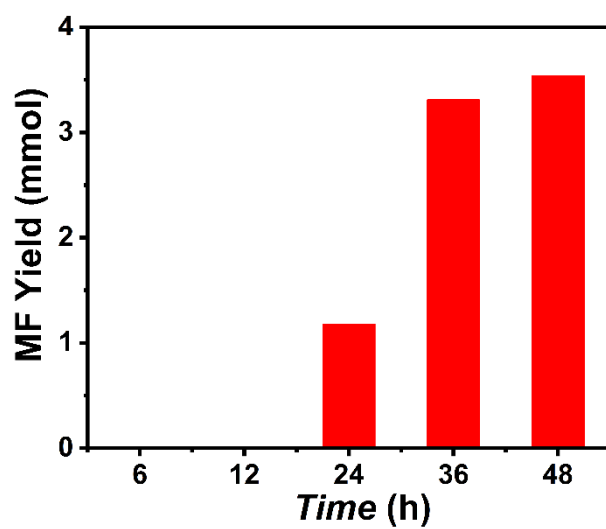

**Fig. S5.** Effect of reaction time on MF yield over Pt (+)|Ti (–) electrodes. Reaction conditions:  $C_{\text{urea}} = 0.05 \text{ mol L}^{-1}$ ,  $C_{\text{NaBr}} = 0.15 \text{ mol L}^{-1}$ , methanol (20 mL), *Current Density* =  $20 \text{ mA cm}^{-2}$ ,  $T = 288 \text{ K}$ .

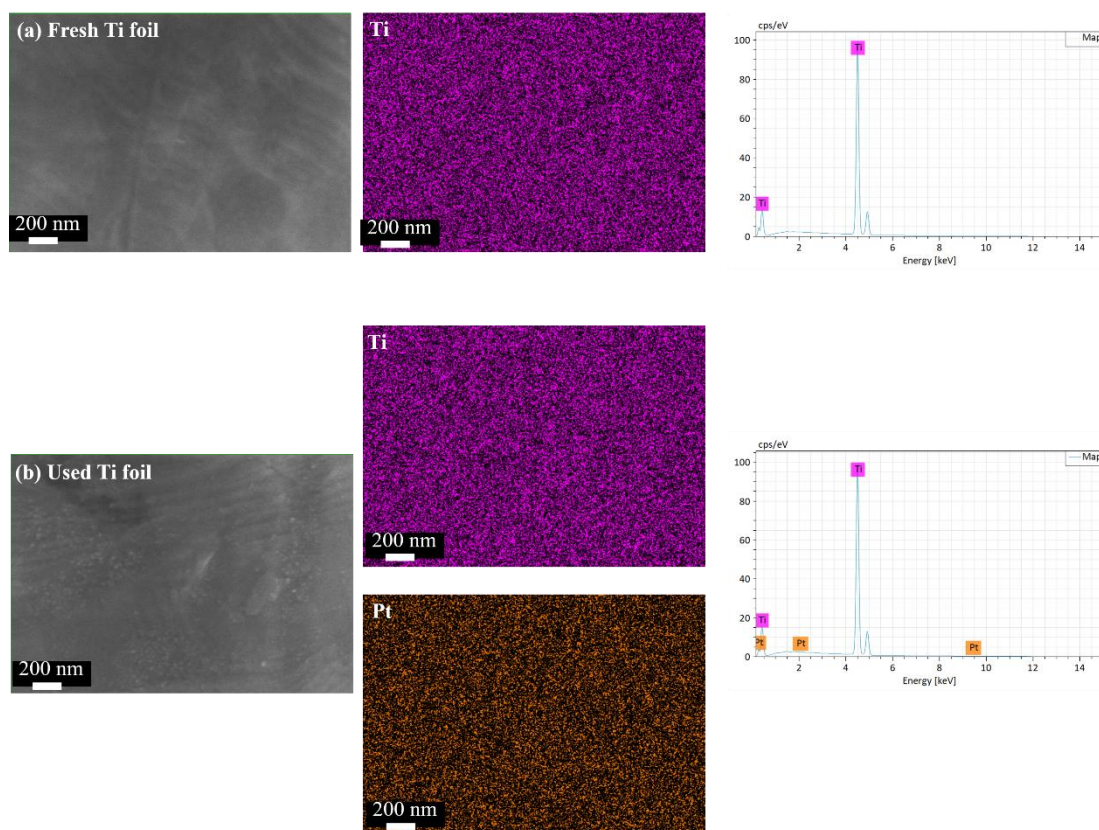

**Fig. S6** SEM images, the corresponding EDX spectra and element mapping of the fresh Ti foil cathode (a) and the used one after the optimized electrosynthesis experiment (b).

It can be seen that there is a tiny difference in the morphologies of the fresh and used Ti foil cathode, indicative of the high stability of Ti foil cathode in this electrosynthesis system. In addition, the content of Pt element in the used Ti foil cathode can be neglected, suggesting that Pt element is hardly dissolved and deposited on the surface of Ti foil cathode.

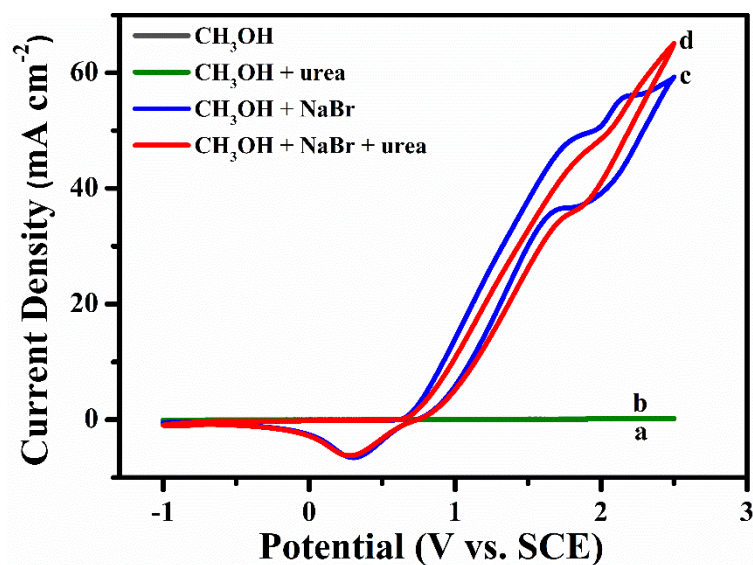

**Fig. S7** CVs of (a)  $\text{CH}_3\text{OH}$ , (b)  $\text{CH}_3\text{OH} + \text{urea}$ , (c)  $\text{CH}_3\text{OH} + \text{NaBr}$ , and (d)  $\text{CH}_3\text{OH} + \text{NaBr} + \text{urea}$  at room temperature, using glassy carbon, platinum plate and saturated calomel (SCE) as the working electrode, the counter electrode, and the reference electrode, respectively.

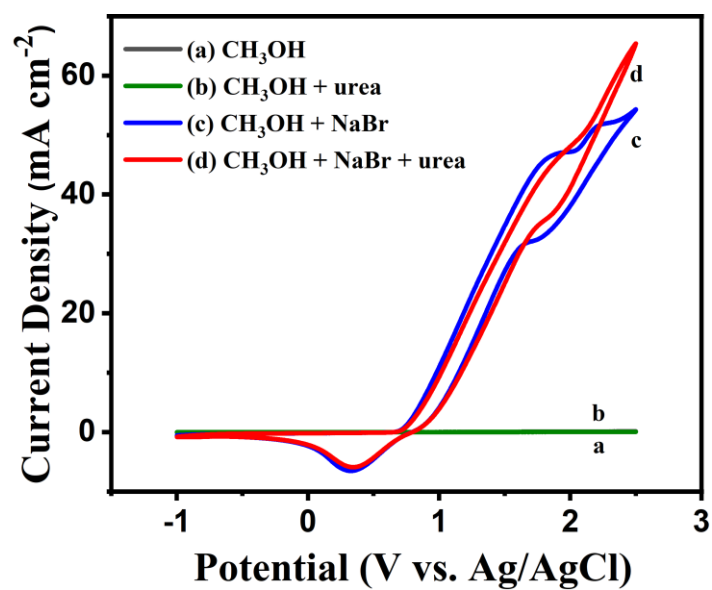

**Fig. S8** CVs of (a) CH<sub>3</sub>OH, (b) CH<sub>3</sub>OH + urea, (c) CH<sub>3</sub>OH + NaBr, and (d) CH<sub>3</sub>OH + NaBr + urea at room temperature, using glassy carbon, platinum plate and Ag/AgCl as the working electrode, the counter electrode, and the reference electrode, respectively.

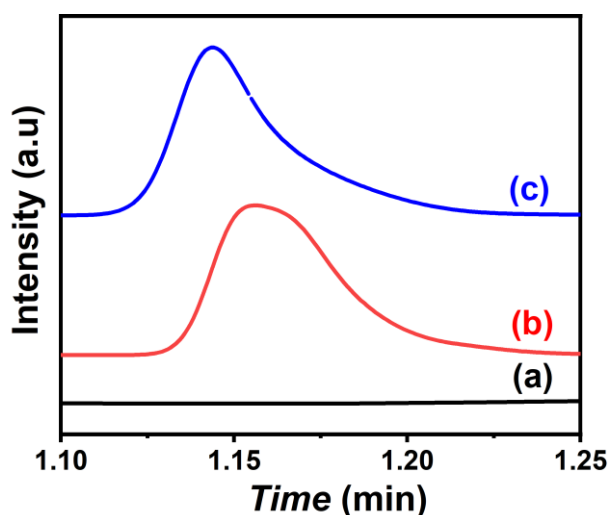

**Fig S9.** The GC results of different solutions: (a) the “CH<sub>3</sub>OH + NaBr + urea” experiment under the conditions of  $C_{\text{urea}} = 0.05 \text{ mol L}^{-1}$ ,  $C_{\text{NaBr}} = 0.15 \text{ mol L}^{-1}$ , methanol (20 mL),  $T = 288 \text{ K}$ ,  $\text{Current Density} = 20 \text{ mA cm}^{-2}$ ,  $\text{Time} = 12 \text{ h}$ ; (b) adding 1-iodobutane into solution (a); butyl methyl ether standard (c).

There was an obviously peak at near 1.15 min after adding the 1-iodobutane into the cathode solution, which can be assigned to butyl methyl ether, suggesting that butyl methyl ether (C<sub>4</sub>H<sub>9</sub>OCH<sub>3</sub>) was produced via the reaction of C<sub>4</sub>H<sub>9</sub>I + CH<sub>3</sub>O<sup>−</sup> → C<sub>4</sub>H<sub>9</sub>OCH<sub>3</sub> + I<sup>−</sup>, indicative of the existence of CH<sub>3</sub>O<sup>−</sup>. Therefore, it can be concluded that conversion from CH<sub>3</sub>OH to CH<sub>3</sub>O<sup>−</sup> happened in this non-aqueous electrosynthesis system.

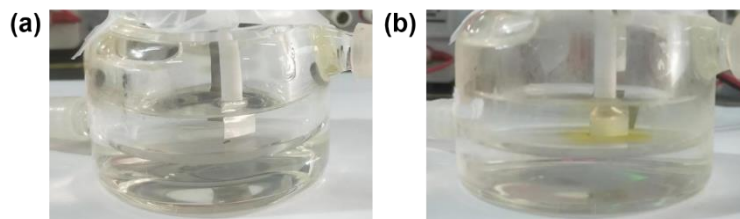

**Fig. S10.** Photographs of (a) the mixture before the electrosynthesis, and (b) the mixture during the electrosynthesis process of DMC from  $\text{CH}_3\text{OH}$ , urea and  $\text{NaBr}$  over  $\text{Pt (+)}|\text{Ti (-)}$  electrodes under the conditions of  $0.05 \text{ mol L}^{-1}$  urea,  $20 \text{ mL}$  methanol,  $0.15 \text{ mol L}^{-1}$   $\text{NaBr}$ ,  $288 \text{ K}$ ,  $20 \text{ mA cm}^{-2}$ .

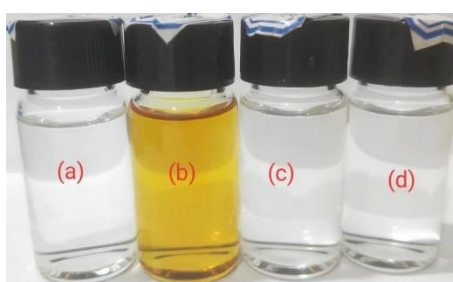

**Fig. S11.** Photographs of different mixtures. (a) The mixture obtained after the electrosynthesis of DMC for  $0.5 \text{ h}$  from  $\text{CH}_3\text{OH}$ , urea and  $\text{NaBr}$  over  $\text{Pt (+)}|\text{Ti (-)}$  electrodes under the conditions of  $0.05 \text{ mol L}^{-1}$  urea,  $20 \text{ mL}$  methanol,  $0.15 \text{ mol L}^{-1}$   $\text{NaBr}$ ,  $288 \text{ K}$ ,  $20 \text{ mA cm}^{-2}$ ; (b) Immediately adding  $\text{NaI}$  into the mixture (a), when no electricity was supplied; (c) The mixture of  $\text{CH}_3\text{OH}$ , urea,  $\text{NaBr}$ , and  $\text{NaI}$  ( $0.05 \text{ mol L}^{-1}$  urea,  $20 \text{ mL}$  methanol,  $0.15 \text{ mol L}^{-1}$   $\text{NaBr}$ , and  $0.15 \text{ mol L}^{-1}$   $\text{NaI}$ ), when no electricity was supplied; (d) The mixture of  $\text{CH}_3\text{OH}$ , urea, and  $\text{NaI}$  ( $0.05 \text{ mol L}^{-1}$  urea,  $20 \text{ mL}$  methanol,  $0.15 \text{ mol L}^{-1}$   $\text{NaI}$ ), when no electricity was supplied.

In order to confirm the formation of  $\text{Br}_2$  in this electrosynthesis system, the color changes of the mixture were monitored under different states. As shown in **Fig. S10a**, the mixture was transparent before the electrosynthesis process started. However, during the electrosynthesis process, the color of the mixture became yellow near the  $\text{Pt}$  anode due to the evolution of  $\text{Br}_2$  from the oxidation of  $\text{Br}^-$  (**Fig. S10b**). After the electrosynthesis was proceeded for  $0.5 \text{ h}$ , the power supply was turned off, and the color of the mixture suddenly faded and became transparent (**Fig. S11a**). These results

indicated the oxidation of  $\text{Br}^-$  to generate  $\text{Br}_2$  actually happened in the Pt anode, and most of the formed  $\text{Br}_2$  might be consumed by reaction with  $\text{CH}_3\text{O}^-$  to produce  $\text{CH}_3\text{OBr}$  after the power supply was turned off, accounting for the faded yellow color after the electricity was turned off.

In addition, to further verify the formation of  $\text{Br}_2$  during the electrosynthesis process, we added NaI into the mixture in **Fig. S11a**. As obviously observed in **Fig. S11b**, the color of the mixture suddenly became much darker. In comparison with the mixture (c) (**Fig. S11c**) and the mixture (d) (**Fig. S11d**) without electricity supplied, it could be concluded that the reaction of  $\text{Br}_2$  and NaI proceeded to form  $\text{I}_2$  and NaBr ( $\text{Br}_2 + 2\text{NaI} = 2\text{NaBr} + \text{I}_2$ ), again suggesting that a minimal amount of  $\text{Br}_2$  was left in the mixture in **Fig. S11a**.

To sum up, with the help of electricity, the  $\text{Br}^-$  ion was easily oxidized to  $\text{Br}_2$  in the Pt anode. The formed  $\text{Br}_2$  could be further reduced to  $\text{Br}^-$  in the Ti cathode during the electrosynthesis process. After the power supply was turned off, the majority of the formed  $\text{Br}_2$  might be consumed to produce  $\text{CH}_3\text{OBr}$  by reaction with  $\text{CH}_3\text{O}^-$ .

**Table S1** The electrosynthesis of DMC from urea and methanol with (i) and without (ii) Ar was used to purge air out of the cell before electrosynthesis.

| Entry | Condition  | DMC Yield |
|-------|------------|-----------|
| i     | With Ar    | 50.4%     |
| ii    | Without Ar | 44.6%     |

Reaction Conditions: Pt plate anode, Ti foil cathode, urea (0.05 mol L<sup>-1</sup>), NaBr (0.15 mol L<sup>-1</sup>), methanol (20 mL), Current Density = 20 mA cm<sup>-2</sup>, 288 K, 12 h, 1 atm.

The effect of air on the electrosynthesis of DMC from urea and methanol was also investigated by comparing the results with/without Ar. As shown in **Table S1**, the obtained DMC yield without Ar was slightly lower than that using Ar. Therefore, Ar was used to purge air out of the cell, and the cell was sealed to ensure an oxygen-free environment.

**Table S2** Effect of NaBr concentration on the conductivity of the mixture of CH<sub>3</sub>OH + urea + NaBr at 298 K and 1 atm.

| Entry | NaBr concentration (mol L <sup>-1</sup> ) | Conductivity of mixture (ms cm <sup>-1</sup> ) |
|-------|-------------------------------------------|------------------------------------------------|
| 1     | 0.05                                      | 3.25                                           |
| 2     | 0.10                                      | 5.94                                           |
| 3     | 0.15                                      | 8.94                                           |
| 4     | 0.20                                      | 10.92                                          |
| 5     | 0.30                                      | 13.31                                          |

**Table S3** Effects of I<sub>2</sub> on the electrosynthesis of DMC from urea and methanol in an undivided cell.<sup>a</sup>

| Entry | Conditions                                       | DMC Yield <sup>b</sup> |
|-------|--------------------------------------------------|------------------------|
| 1     | Without electricity                              | n. d.                  |
| 2     | With a current density of 20 mA cm <sup>-2</sup> | n. d.                  |

<sup>a</sup> Pt plate anode, Ti foil cathode, 0.05 mol L<sup>-1</sup> urea, 20 mL methanol, 0.075 mol L<sup>-1</sup> I<sub>2</sub>, 288 K, 12 h, 1 atm.

<sup>b</sup> Yield was analyzed by GC-MS and GC with an internal standard, n. d. = not detected.

**Table S4** Effects of Br<sub>2</sub> on the electrosynthesis of DMC from urea and methanol in an undivided cell.<sup>a</sup>

| Entry | Conditions                                       | DMC Yield <sup>b</sup> |
|-------|--------------------------------------------------|------------------------|
| 1     | Without electricity                              | n. d.                  |
| 2     | With a current density of 20 mA cm <sup>-2</sup> | n. d.                  |

<sup>a</sup> Pt plate anode, Ti foil cathode, 0.05 mol L<sup>-1</sup> urea, 20 mL methanol, 0.075 mol L<sup>-1</sup> Br<sub>2</sub>, 288 K, 12 h, 1 atm.

<sup>b</sup> Yield was analyzed by GC-MS and GC with an internal standard, n. d. = not detected.

**Table S5** Effects of anode materials on the electrosynthesis of DMC from urea and methanol in an undivided cell.<sup>a</sup>

| Entry | Anode material     | DMC Yield <sup>b</sup> |
|-------|--------------------|------------------------|
| 1     | Pt plate           | 50.4%                  |
| 2     | graphite plate     | 45.0%                  |
| 3     | glassy carbon (GC) | 25.7%                  |

<sup>a</sup> Ti foil cathode, urea (0.05 mol L<sup>-1</sup>), NaBr (0.15 mol L<sup>-1</sup>), methanol (20 mL), Current Density = 20 mA cm<sup>-2</sup>, 288 K, 12 h, 1 atm.

<sup>b</sup> Yield was analyzed by GC-MS and GC with an internal standard, n. d. = not detected.

**Table S6** Determination of Pt content in the solution after the electrosynthesis of DMC from urea and methanol over Pt (+)|Ti (–) electrodes under the conditions of 0.05 mol L<sup>–1</sup> urea, 20 mL methanol, 0.15 mol L<sup>–1</sup> NaBr, 20 mA cm<sup>–2</sup>, 288 K, 12 h, 1 atm.

| Element | Concentration (μg L <sup>–1</sup> ) <sup>a</sup> | Wt (%) <sup>b</sup>  |
|---------|--------------------------------------------------|----------------------|
| Pt      | $3.6 \times 10^{-2}$                             | $4.5 \times 10^{-9}$ |

<sup>a</sup> Obtained by inductively coupled plasma mass spectrometry (ICP-MS) using a PerkinElmer NexION 1000

<sup>b</sup> Based on the total weight of the solution after the electrosynthesis experiment

As shown **Table S6**, the content of Pt element in the solution after the electrosynthesis experiment can be negligible, indicating Pt anode is very stable in our non-aqueous system.

**Table S7** Comparison of electrosynthesis of DMC from urea and methanol with reported thermo-synthesis results.

| Types                   | Catalysts                                                              | Starting Materials                              | Temperature<br>(K) | Pressure     | Time<br>(h) | DMC Yield<br>(%) | Ref.             |
|-------------------------|------------------------------------------------------------------------|-------------------------------------------------|--------------------|--------------|-------------|------------------|------------------|
| <b>Thermo-synthesis</b> | ZnO-SrO                                                                | n(methanol) : n(urea) = 15                      | 443                | No mention   | 6           | 35               | 1                |
|                         | ZnO(0.54)-Nb <sub>2</sub> O <sub>5</sub> (0.20)TiO <sub>2</sub> (0.26) | n(methanol) : n(urea) = 20                      | 413                | No mention   | 4           | 39.1             | 2                |
|                         | ZnO                                                                    | n(methanol) : n(urea) = 20                      | 443                | No mention   | 8           | ~30              | 3                |
|                         | Zn/Al mixed oxides                                                     | n(methanol) : n(urea) = 20                      | 453                | No mention   | 10          | ~36.5            | 4                |
|                         | ZnO(0.7)-CeO <sub>2</sub> (0.3)                                        | n(methanol) : n(urea) = 20                      | 443                | No mention   | 4           | 28.9             | 5                |
|                         | ZnO(0.64)-CeO <sub>2</sub> (0.26)-La <sub>2</sub> O <sub>3</sub> (0.1) | n(methanol) : n(urea) = 20                      | 443                | 20 bar       | 4           | 50.4             | 6                |
|                         | ZnO-CaO                                                                | n(methanol) : n(urea) = 20                      | 453                | No mention   | 10          | 41.2             | 7                |
|                         | Fe <sub>2</sub> O <sub>3</sub> /HMCM-49                                | n(methanol) : n(urea) = 160                     | 453                | No mention   | 8           | 33.4             | 8                |
| <b>Electrosynthesis</b> | <b>None</b>                                                            | <b>0.05 mol L<sup>-1</sup> urea in methanol</b> | <b>288</b>         | <b>1 atm</b> | <b>12</b>   | <b>50.4</b>      | <b>This work</b> |

**Table S8** Comparison of electrosynthesis of DMC from urea and methanol with the reported literatures on electrosynthesis of DMC from CO<sub>2</sub> and methanol.

| Entry | Electrochemical cell | Conditions                                                     | Reactants and Supporting Electrolyte                                          | Time (h) | Temperature (K) | DMC Yield (%) | Ref. |
|-------|----------------------|----------------------------------------------------------------|-------------------------------------------------------------------------------|----------|-----------------|---------------|------|
| 1     | Undivided cell       | Nanoporous copper incorporated platinum, Mg rod, -2.2 V vs. Ag | CO <sub>2</sub> , CH <sub>3</sub> OH, BmimBF <sub>4</sub> , CH <sub>3</sub> I | 6        | 298             | 81            | 9    |
| 2     | Undivided cell       | Pt (-)   Pt (+),<br>5.5 V (cell potential)                     | CO <sub>2</sub> , CH <sub>3</sub> OH, BmimBr, epoxide                         | 48       | 303             | 75.5          | 10   |
| 3     | Undivided cell       | In, Pt foil, -1.7 V vs. Ag                                     | CO <sub>2</sub> , CH <sub>3</sub> OH, BmimBF <sub>4</sub> , CH <sub>3</sub> I | 6        | 313             | 76            | 11   |
| 4     | Undivided cell       | Cu (-)   Mg (+), -1.8 V vs. Ag/AgI                             | CO <sub>2</sub> , CH <sub>3</sub> OH, BmimBF <sub>4</sub> , CH <sub>3</sub> I | 6        | 298             | 33            | 12   |
| 5     | Undivided cell       | Pt (-)   Pt (+),<br>5.5 V (cell potential)                     | CO <sub>2</sub> , CH <sub>3</sub> OH, BmimBr, CH <sub>3</sub> OK              | 48       | 303             | 3.9           | 13   |
| 6     | Undivided cell       | Graphite (-)   Pt (+),<br>4.0 V (cell potential)               | CO <sub>2</sub> , CH <sub>3</sub> OH, BzmimCl                                 | 60       | 293             | 3.8           | 14   |
|       |                      |                                                                | CO <sub>2</sub> , CH <sub>3</sub> OH, BmimCl                                  |          |                 | 3.7           |      |
|       |                      |                                                                | CO <sub>2</sub> , CH <sub>3</sub> OH, BmimOH                                  |          |                 | 3.1           |      |
|       |                      |                                                                | CO <sub>2</sub> , CH <sub>3</sub> OH, BmimBr                                  |          |                 | 2.1           |      |
|       |                      |                                                                | CO <sub>2</sub> , CH <sub>3</sub> OH, BmimBF <sub>4</sub>                     |          |                 | 0.3           |      |
|       |                      |                                                                | CO <sub>2</sub> , CH <sub>3</sub> OH, EmimBF <sub>4</sub>                     |          |                 | 1.3           |      |
|       |                      |                                                                | CO <sub>2</sub> , CH <sub>3</sub> OH, EmimBr                                  |          |                 | 0.6           |      |
| 7     | Divided cell         | Pt/Nb plate (-)   Pt/Nb plate (+),<br>1.2 V vs. Ag/AgCl        | CO <sub>2</sub> , CH <sub>3</sub> OH, BmimBr, CH <sub>3</sub> OK              | 48       | 279             | 12.5          | 15   |
| 8     | Undivided cell       | Graphite (-)   Pt (+),                                         | CO <sub>2</sub> , CH <sub>3</sub> OH, BmimOH                                  | 40       | 293             | 0.85          | 16   |

|           |                       |                                                                      |                                                           |           |                     |             |                  |
|-----------|-----------------------|----------------------------------------------------------------------|-----------------------------------------------------------|-----------|---------------------|-------------|------------------|
|           |                       | 3.5 V (cell potential)                                               | CO <sub>2</sub> , CH <sub>3</sub> OH, ApmimBr             |           |                     | 1.06        |                  |
|           |                       |                                                                      | CO <sub>2</sub> , CH <sub>3</sub> OH, BmimBr              |           |                     | 0.43        |                  |
|           |                       |                                                                      | CO <sub>2</sub> , CH <sub>3</sub> OH, BmimBF <sub>4</sub> |           |                     | 0.2         |                  |
| 9         | Undivided cell        | Au (-)   glassy carbon (+),<br>Pd/C catalyst, 12 mA cm <sup>-2</sup> | CO <sub>2</sub> , CH <sub>3</sub> OH, NaBr                | -         | room<br>temperature | FE 60%      | 17               |
| <b>10</b> | <b>Undivided cell</b> | <b>Ti (-)   Pt (+), 20 mA cm<sup>-2</sup></b>                        | <b>Urea, CH<sub>3</sub>OH, NaBr</b>                       | <b>12</b> | <b>288</b>          | <b>50.4</b> | <b>This work</b> |

## References

- [1] D. D. Lakshmi, B. S. Rao, N. Lingaiah, *Catal. Commun.*, 2019, **122**, 1-4.
- [2] S. Asghari, M. Ghiaci, *Ind. Eng. Chem. Res.*, 2020, **59**, 6405-6415.
- [3] M. H. Wang, N. Zhao, W. Wei, Y. H. Sun, *Ind. Eng. Chem. Res.*, 2005, **44**, 7596-7599.
- [4] X. M. Wu, M. Kang, Y. L. Yin, F. Wang, N. Zhao, F. K. Xiao, W. Wei, Y. H. Sun, *Appl. Catal., A*, 2014, **473**, 13-20.
- [5] W. Joe, H. J. Lee, U. G. Hong, Y. S. Ahn, C. J. Song, B. J. Kwon, I. K. Song, *J. Ind. Eng. Chem.*, 2012, **18**, 1018-1022.
- [6] W. Joe, H. J. Lee, U. G. Hong, Y. S. Ahn, C. J. Song, B. J. Kwon, I. K. Song, *J. Ind. Eng. Chem.*, 2012, **18**, 1730-1735.
- [7] X. M. Wu, M. Kang, N. Zhao, W. Wei, Y. H. Sun, *Catal. Commun.*, 2014, **46**, 46-50.
- [8] C. Zhang, B. Lu, X. G. Wang, J. X. Zhao, Q. H. Cai, *Catal. Sci. Technol.*, 2012, **2**, 305-309.
- [9] Q. J. Feng, S. Q. Liu, X. Y. Wang, G. H. Jin, *Appl. Surf. Sci.*, 2012, **258**, 5005-5009.
- [10] C. H. Yan, B. Lu, X. G. Wang, J. X. Zhao, Q. H. Cai, *J Chem Technol Biotechnol.*, 2011, **86**, 1413-1417.
- [11] F. F. Liu, S. Q. Liu, Q. J. Feng, S. X. Zhuang, J. B. Zhang, P. Bu, *Int. J. Electrochem. Sci.*, 2012, **7**, 4381-4387.
- [12] L. Zhang, D. F. Niu, K. Zhang, G. R. Zhang, Y. W. Luo, J. X. Lu, *Green Chem.*, 2008, **10**, 202-206.
- [13] D. D. Yuan, C. H. Yan, B. Lu, H. X. Wang, C. M. Zhong, Q. H. Cai, *Electrochim. Acta*, 2009, **54**, 2912-2915.
- [14] X. Yuan, B. Lu, J. Z. Liu, X. L. You, J. X. Zhao, Q. H. Cai, *J. Electrochem. Soc.*, 2012, **159**, E183-E186.
- [15] I. G. Herrero, M. A. Guerra, A. Irabien, *J Chem Technol Biotechnol.*, 2015, **90**, 1433-1438.
- [16] B. Lu, X. Wang, Y. Li, J. Sun, J. X. Zhao, Q. H. Cai, *J. CO<sub>2</sub> Util.*, 2013, **3-4**, 98-101.
- [17] K. M. Lee, J. H. Jang, M. Balamurugan, J. E. Kim, Y. I. Jo, K. T. Nam, *Nat. Energy*, 2021, **6**, 733-741.
